# Supplementary material
Source: HighWire-hosted journal article supplement (https://bmjopen.bmj.com/content/14/11/e080662)
Supplement: inline-supplementary-material-1 [file inline-supplementary-material-1.pdf]

INSTITUTE OF HEALTH SCIENCES  
FEDERAL UNIVERSITY OF PARÁ

Research project data

Research title: WOMEN'S EXPERIENCE OF PLANNED HOMEBIRTH IN THE AMAZON CONTEXT: THE RIGHT TO CHOOSE

Researcher: Dr. Diego Pereira Rodrigues<sup>7</sup>

CAAE: 39952720.3.0000.0018

Proposing Institution: Institute of Health Sciences of the Federal University of Pará - ICS/UFPA

Opinion Number: 4.463.291

### **Presentation of the topic**

Discussions on childbirth and obstetric care in Brazil have been guided by social, cultural, economic and, more recently, health trends, in different realities of access and/or choice of the parturition process, and from the perspective of women's "right" to opt for a planned home birth, given that "obstetric care in Brazil is predominantly hospitalized and medicalized, given that more than 99% of births take place in a hospital environment, most of them assisted by medical professionals" (CURSINO; BENINCASA, 2020, p. 14). 1434).

The research presents a recurring problem in women's care in the field of labor and birth, in relation to women's respect for their choice of PDP.

### **Objectives**

To understand women's experience of planned home birth in the metropolitan region of the state of Pará; To uncover women's perceptions of the option of planned home birth; To identify the process of seeking knowledge to guarantee the option of planned home birth; To analyze women's experience of care during planned home birth.

### **Assessment of risks and benefits:**

It should be emphasized that the research does not foresee any eminent risks, however when dealing with interviewer/interviewee social interaction we are subject to embarrassment or issues of this nature that may arise during the process, given the subjectivity of human relations, even if it is not desired. These issues must be overcome in the light of the sensitivity and dialog maintained by the researcher, leading to an understanding of the importance and magnitude of sharing experiences. In this way, the researcher is trained to apply the data collection instrument, with the aim of avoiding risks to the participants, and that in this application process, the researcher will safeguard the physical, psychological and emotional integrity of each participant.

**Benefits:** The benefits of the study are within the scope of women's rights, professionals in the context of obstetric nursing in the state of Pará, as well as for the scientific community and society in general, with a view to contributing to changing paradigms and joint growth in the face of the challenges surrounding the choice of planned home birth.

### **Comments:**

The research is of scientific relevance, clearly pertinent in its general and specific objectives. Unveil the perception of women about the option of planned home birth. Identify the process of seeking knowledge to ensure the option of planned home birth. To analyze women's experiences of care during planned home births.

**Considerations on the Terms of Mandatory Presentation:**

All mandatory terms were presented clearly

**Conclusions or Outstanding Issues and List of Inadequacies:**

In view of the above, we are in favor of approving the protocol. This is our opinion, SMJ.

**Status of Opinion:**

Approved

**Needs CONEP appraisal:**

No
